# Supplementary material for: Establishment of a Sonotrode Ultrasound-Assisted Extraction of Phenolic Compounds from Apple Pomace
Source: MDPI journal article supplement (doi:10.3390/foods11233809), 2022-11-25
Supplement: s1 [file s1]

Supplementary Materials

**Table S1.** Identified amygdalin by HPLC-ESI-TOF-MS in apple pomace with seed extracts.

| Peak | Rt<br>(min) | Observed<br><i>m/z</i> | Calculated<br><i>m/z</i> | Error<br>(ppm) | Score<br>(%) | Molecular<br>formula                             | In source <i>m/z</i><br>fragments | Compound name |
|------|-------------|------------------------|--------------------------|----------------|--------------|--------------------------------------------------|-----------------------------------|---------------|
| 1    | 3.47        | 456.1504               | 456.1506                 | -0.4           | 94.30        | C <sub>20</sub> H <sub>26</sub> NO <sub>11</sub> | 323.0913                          | Amygdalin     |

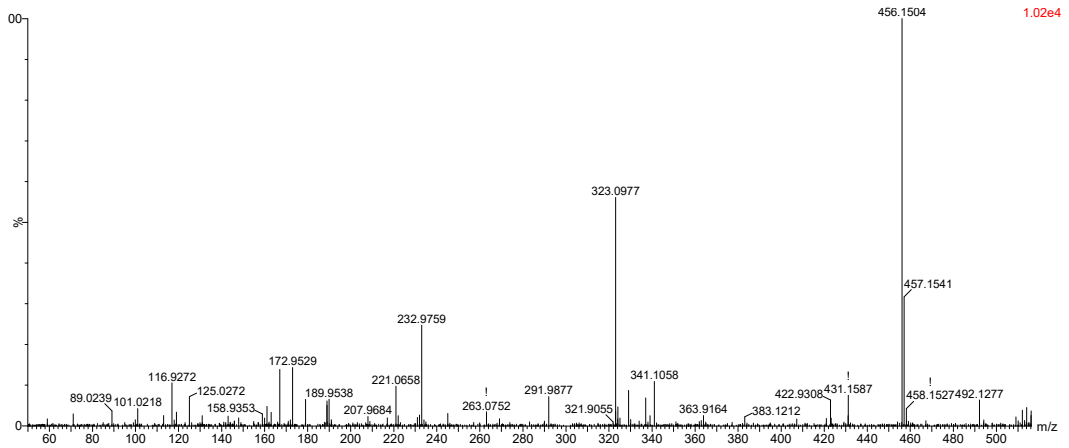

**Figure S1.** Negative mode product ion spectrum of amygdalin (465 m/z).

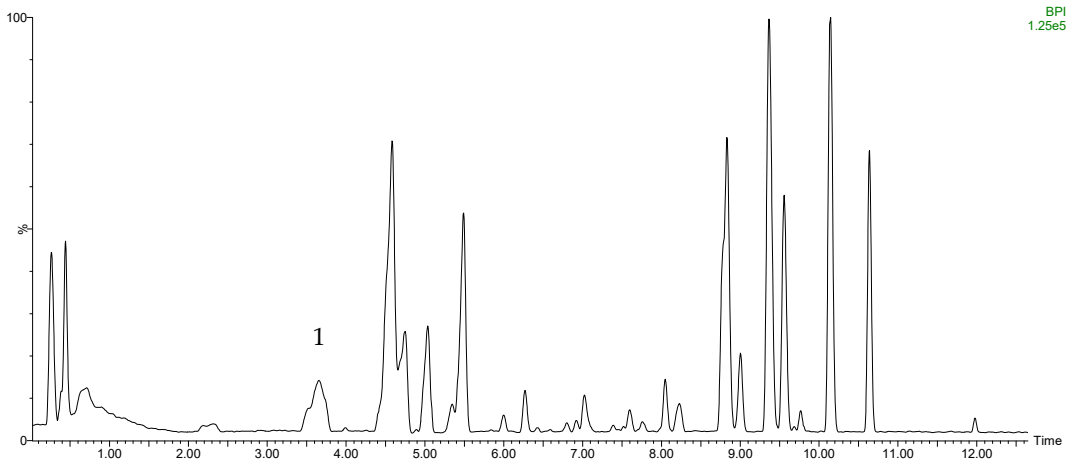

**Figure S2.** HPLC-TOF-MS chromatogram of apple pomace with seed extracts. 1: Amygdalin.

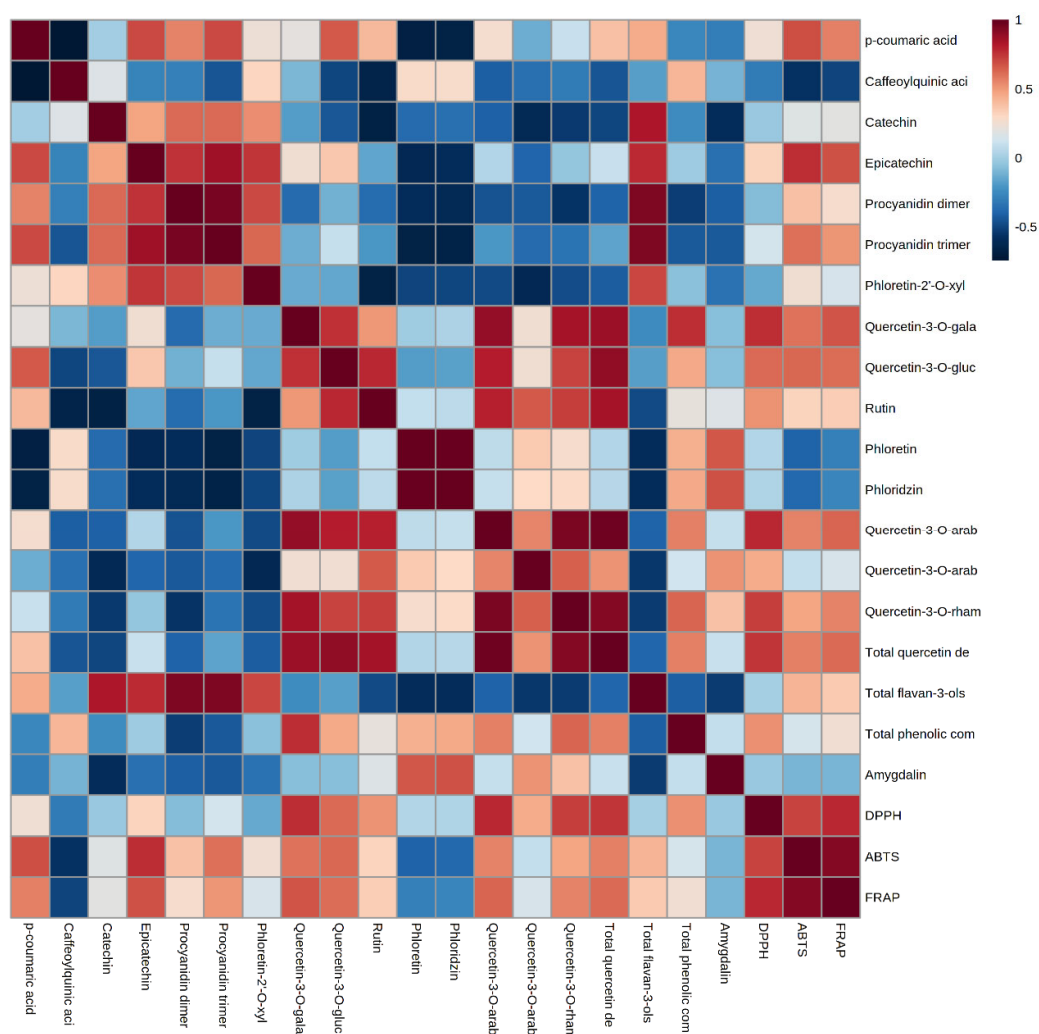

**Figure S3.** Pearson's correlation heatmap for all the analyses performed in the different varieties of apple pomace analyzed with and without seed. .
